# Supplementary material for: Sex-specific KDM6A-HNF4A-CREBH network controls lipoprotein cholesterol metabolism and atherosclerosis via epigenetic reprograming of hepatocytes
Source: Research Square preprint supplement (doi:10.21203/rs.3.rs-6065505/v1), 2026-01-05
Supplement: Supplementary file 1 [file 1ee9115567b9ca6670d9fad2.pdf]

## Reporting Summary

Nature Portfolio wishes to improve the reproducibility of the work that we publish. This form provides structure for consistency and transparency in reporting. For further information on Nature Portfolio policies, see our [Editorial Policies](#) and the [Editorial Policy Checklist](#).

### Statistics

For all statistical analyses, confirm that the following items are present in the figure legend, table legend, main text, or Methods section.

n/a Confirmed

- The exact sample size ( $n$ ) for each experimental group/condition, given as a discrete number and unit of measurement
- A statement on whether measurements were taken from distinct samples or whether the same sample was measured repeatedly
- The statistical test(s) used AND whether they are one- or two-sided  
*Only common tests should be described solely by name; describe more complex techniques in the Methods section.*
- A description of all covariates tested
- A description of any assumptions or corrections, such as tests of normality and adjustment for multiple comparisons
- A full description of the statistical parameters including central tendency (e.g. means) or other basic estimates (e.g. regression coefficient) AND variation (e.g. standard deviation) or associated estimates of uncertainty (e.g. confidence intervals)
- For null hypothesis testing, the test statistic (e.g.  $F$ ,  $t$ ,  $r$ ) with confidence intervals, effect sizes, degrees of freedom and  $P$  value noted  
*Give  $P$  values as exact values whenever suitable.*
- For Bayesian analysis, information on the choice of priors and Markov chain Monte Carlo settings
- For hierarchical and complex designs, identification of the appropriate level for tests and full reporting of outcomes
- Estimates of effect sizes (e.g. Cohen's  $d$ , Pearson's  $r$ ), indicating how they were calculated

*Our web collection on [statistics for biologists](#) contains articles on many of the points above.*

### Software and code

Policy information about [availability of computer code](#)

#### Data collection

ChIP-seq data collection. Fresh liver tissues (chopped into small pieces) and HRO or Huh1 cells were crosslinked with 1% formaldehyde (28906, ThermoFisher) in PBS for 10 minutes for histone modifications. For TFs or coregulators, tissues/cells were double crosslinked with 2 mM disuccinimidyl glutarate (DSG) (20593, ThermoFisher) for 30 minutes, followed by 1% formaldehyde for 10 minutes. The reaction was stopped with glycine at a final concentration of 0.125 M for 5 minutes. Liver pieces were disaggregated in ice-cold PBS with protease inhibitor (12352204, Roche) using a dounce homogenizer, first with a loose pestle and then with a tight pestle (FB56691, Fisher Science). Nuclei were isolated using three lysis buffers: lysis buffer 1 (50 mM Hepes-KOH, pH 7.5, 140 mM NaCl, 1 mM EDTA, 10% glycerol, 0.5% IGEPAL CA-630, and 0.25% Triton X-100), lysis buffer 2 (10 mM Tris-HCl, pH 8.0, 200 mM NaCl, 1 mM EDTA, and 0.5 mM EGTA), and lysis buffer 3 (10 mM Tris-HCl, pH 8.0, 100 mM NaCl, 1 mM EDTA, 0.5 mM EGTA, 0.1% Na-deoxycholate, and 0.5% N-Lauroylsarcosine). The samples were then sonicated for 30 minutes (30 seconds ON/30 seconds OFF) using the Bioruptor Pico (Diagenode). Protein A Dynabeads (10001D, Invitrogen) were incubated overnight with the antibodies. Each lysate was immunoprecipitated with the following antibodies: control rabbit IgG (sc-2027, Santa Cruz, 1–5  $\mu$ g), anti-H3K27ac (ab177178, Abcam, 1  $\mu$ g), anti-H3K4me1 (ab8895, Abcam, 1  $\mu$ g), and anti-H3K4me2 (ab7766, Abcam, 1  $\mu$ g), anti-CREBH (HPA040671, Sigma Aldrich, 1 $\mu$ g). The immunoprecipitated Protein A beads were washed 3 times with lysis buffer and sent for proteomics analysis (RIME37). Formaldehyde cross-linking was reversed overnight at 65°C, and the immunoprecipitated DNA was purified using the QIAquick PCR purification kit (Qiagen).

For ChIPseq library preparation, the same ChIP protocol was followed, but the ChIP DNA was purified using the ChIP DNA Clean and Concentrator Capped Zymo-Spin I (Zymo Research) purification kit. Two to four ChIPs were pooled during the final purification step to obtain concentrated material. For library preparation and sequencing, 2–10 ng of ChIPed DNA was processed using the Rubicon ThruPLEX DNA-seq kit (TAKARA) following standard protocols, and sequenced on the NovaSeq X Plus Series (150PE reads, Novogene).

CUT&Tag sample preparation. CUT&Tag sample preparation was performed following published protocols from the Henikoff lab.

Approximately 500,000 HRO or Huh1 cells were harvested and counted and were resuspended in Wash Buffer and mixed with Concanavalin A-coated magnetic beads. The mixture was incubated at room temperature to allow binding. Bead-bound cells were then washed and

incubated with the primary antibodies specific to the target protein, followed by a secondary antibody (PA5-31828, EpiCypher) for bridging. Next, the bead-bound cells were incubated with pAG-Tn5 (79561, EpiCypher) in the presence of digitonin for tethering. After a brief incubation to allow the transposome to tether to chromatin sites targeted by antibodies, cells were washed and subjected to magnesium activation to induce tagmentation. This step facilitated DNA cleavage and simultaneous tagging with sequencing adapters. Following tagmentation, DNA was extracted and quantified using Qubit fluorometer (Thermo Fisher) following the instructions. Libraries were PCR-amplified with barcoded primers, cleaned up using SPRI beads, and subjected to quality control checks, including size selection and quantification. The prepared libraries were sequenced on the NovaSeq X Plus Series (150PE reads, Novogene, United Kingdom). RNA-seq data collection. RNA was extracted from mouse liver biopsies or human cell lines using the kit stated above. RNA quality was assessed using the 5400 Fragment Analyzer System (Agilent). mRNA library preparation was carried out using the Novogene NGS RNA Library Prep Set (PT042, Novogene) following the manufacturer's protocol. RNA-seq libraries were sequenced on the NovaSeq X Plus Series (PE150) platform at NOVOGENE (Cambridge, United Kingdom).

## Data analysis

ChIP-seq data analysis. Computations of mice data were performed using resources provided by Galaxy. The computations of human data was enabled by resources in project sens2024555 provided by the National Academic Infrastructure for Supercomputing in Sweden (NAISS) at UPPMAX. Analysis was conducted as previously described. Sequencing files (fastq) provided by Novogene (Cambridge, United Kingdom), along with the raw data from published ChIP-seq datasets (KDM6A: GSE95890; HNF4A: GSE31477), were aligned to the NCBI38/mm10 version of the mouse reference genome or GRCh38/hg38 using Bowtie2. Peaks were identified using the HOMER package.

Peak heights were normalized to the total number of uniquely mapped reads and displayed in the Integrative Genomics Viewer (IGV) as the number of tags per 10 million tags. For statistical analysis of the peaks, raw tag counts were imported into R and Bioconductor, and the edgeR package was used to identify potential differential-binding sites.

CUT&Tag data analysis. Sequencing data was processed using standard pipelines. Sequencing files (fastq) provided by Novogene (Cambridge, United Kingdom) were aligned to the GRCh38/hg38 version of the human reference genome using Bowtie2. Duplicate reads were removed, and peaks were called using the HOMER package to identify regions of significant enrichment. SEACR is used to call peaks and enriched regions from chromatin profiling data. ChIPseqSpikelnFree is used to normalize Data.

RNA-seq data analysis: Preprocessed reads were aligned to the NCBI38/mm10 (for mouse) or GRCh38/hg38 (for human) genomes using the HISAT2 program, and read counts were determined using featureCounts v1.5.0-p3. Raw tag counts were imported into R and Bioconductor, and differential gene expression was analyzed using the edgeR package.

For manuscripts utilizing custom algorithms or software that are central to the research but not yet described in published literature, software must be made available to editors and reviewers. We strongly encourage code deposition in a community repository (e.g. GitHub). See the Nature Portfolio [guidelines for submitting code & software](#) for further information.

## Data

Policy information about [availability of data](#)

All manuscripts must include a [data availability statement](#). This statement should provide the following information, where applicable:

- Accession codes, unique identifiers, or web links for publicly available datasets
- A description of any restrictions on data availability
- For clinical datasets or third party data, please ensure that the statement adheres to our [policy](#)

Gene expression RNA-seq data, CUT&Tag and ChIP-seq data have been deposited at the NCBI Gene Expression Omnibus (GEO) accession numbers are GSE287680, GSE287688 and GSE287736. Other data are available from the corresponding author upon request.

## Research involving human participants, their data, or biological material

Policy information about studies with [human participants or human data](#). See also policy information about [sex, gender \(identity/presentation\), and sexual orientation](#) and [race, ethnicity and racism](#).

### Reporting on sex and gender

*Use the terms sex (biological attribute) and gender (shaped by social and cultural circumstances) carefully in order to avoid confusing both terms. Indicate if findings apply to only one sex or gender; describe whether sex and gender were considered in study design; whether sex and/or gender was determined based on self-reporting or assigned and methods used. Provide in the source data disaggregated sex and gender data, where this information has been collected, and if consent has been obtained for sharing of individual-level data; provide overall numbers in this Reporting Summary. Please state if this information has not been collected. Report sex- and gender-based analyses where performed, justify reasons for lack of sex- and gender-based analysis.*

### Reporting on race, ethnicity, or other socially relevant groupings

*Please specify the socially constructed or socially relevant categorization variable(s) used in your manuscript and explain why they were used. Please note that such variables should not be used as proxies for other socially constructed/relevant variables (for example, race or ethnicity should not be used as a proxy for socioeconomic status). Provide clear definitions of the relevant terms used, how they were provided (by the participants/respondents, the researchers, or third parties), and the method(s) used to classify people into the different categories (e.g. self-report, census or administrative data, social media data, etc.) Please provide details about how you controlled for confounding variables in your analyses.*

### Population characteristics

*Describe the covariate-relevant population characteristics of the human research participants (e.g. age, genotypic information, past and current diagnosis and treatment categories). If you filled out the behavioural & social sciences study design questions and have nothing to add here, write "See above."*

### Recruitment

*Describe how participants were recruited. Outline any potential self-selection bias or other biases that may be present and how these are likely to impact results.*

## Ethics oversight

Note that full information on the approval of the study protocol must also be provided in the manuscript.

## Field-specific reporting

Please select the one below that is the best fit for your research. If you are not sure, read the appropriate sections before making your selection.

Life sciences       Behavioural & social sciences       Ecological, evolutionary & environmental sciences

For a reference copy of the document with all sections, see [nature.com/documents/nr-reporting-summary-flat.pdf](https://www.nature.com/documents/nr-reporting-summary-flat.pdf)

## Life sciences study design

All studies must disclose on these points even when the disclosure is negative.

Sample size

Data exclusions

Replication

Randomization

Blinding

## Reporting for specific materials, systems and methods

We require information from authors about some types of materials, experimental systems and methods used in many studies. Here, indicate whether each material, system or method listed is relevant to your study. If you are not sure if a list item applies to your research, read the appropriate section before selecting a response.

### Materials & experimental systems

| n/a                      | Involved in the study                                           |
|--------------------------|-----------------------------------------------------------------|
| <input type="checkbox"/> | <input checked="" type="checkbox"/> Antibodies                  |
| <input type="checkbox"/> | <input checked="" type="checkbox"/> Eukaryotic cell lines       |
| <input type="checkbox"/> | <input type="checkbox"/> Palaeontology and archaeology          |
| <input type="checkbox"/> | <input checked="" type="checkbox"/> Animals and other organisms |
| <input type="checkbox"/> | <input type="checkbox"/> Clinical data                          |
| <input type="checkbox"/> | <input type="checkbox"/> Dual use research of concern           |
| <input type="checkbox"/> | <input type="checkbox"/> Plants                                 |

### Methods

| n/a                      | Involved in the study                           |
|--------------------------|-------------------------------------------------|
| <input type="checkbox"/> | <input checked="" type="checkbox"/> ChIP-seq    |
| <input type="checkbox"/> | <input type="checkbox"/> Flow cytometry         |
| <input type="checkbox"/> | <input type="checkbox"/> MRI-based neuroimaging |

## Antibodies

Antibodies used

Validation

## Eukaryotic cell lines

Policy information about [cell lines and Sex and Gender in Research](#)

Cell line source(s)

Authentication

|                                                                      |                                                                                                     |
|----------------------------------------------------------------------|-----------------------------------------------------------------------------------------------------|
| Mycoplasma contamination                                             | All the cells have been tested for mycoplasma contaminations.                                       |
| Commonly misidentified lines<br>(See <a href="#">ICLAC</a> register) | Name any commonly misidentified cell lines used in the study and provide a rationale for their use. |

## Palaeontology and Archaeology

|                                                                                                                                                 |                                                                                                                                                                                                                                                                               |
|-------------------------------------------------------------------------------------------------------------------------------------------------|-------------------------------------------------------------------------------------------------------------------------------------------------------------------------------------------------------------------------------------------------------------------------------|
| Specimen provenance                                                                                                                             | Provide provenance information for specimens and describe permits that were obtained for the work (including the name of the issuing authority, the date of issue, and any identifying information). Permits should encompass collection and, where applicable, export.       |
| Specimen deposition                                                                                                                             | Indicate where the specimens have been deposited to permit free access by other researchers.                                                                                                                                                                                  |
| Dating methods                                                                                                                                  | If new dates are provided, describe how they were obtained (e.g. collection, storage, sample pretreatment and measurement), where they were obtained (i.e. lab name), the calibration program and the protocol for quality assurance OR state that no new dates are provided. |
| <input type="checkbox"/> Tick this box to confirm that the raw and calibrated dates are available in the paper or in Supplementary Information. |                                                                                                                                                                                                                                                                               |
| Ethics oversight                                                                                                                                | Identify the organization(s) that approved or provided guidance on the study protocol, OR state that no ethical approval or guidance was required and explain why not.                                                                                                        |

Note that full information on the approval of the study protocol must also be provided in the manuscript.

## Animals and other research organisms

Policy information about [studies involving animals](#); [ARRIVE guidelines](#) recommended for reporting animal research, and [Sex and Gender in Research](#)

|                         |                                                                                                                                                                                                                                                                                                                                                                                                                                                                                                                                      |
|-------------------------|--------------------------------------------------------------------------------------------------------------------------------------------------------------------------------------------------------------------------------------------------------------------------------------------------------------------------------------------------------------------------------------------------------------------------------------------------------------------------------------------------------------------------------------|
| Laboratory animals      | Kdm6aflox/flox mice were developed in Cyagen using a targeting construct which contains loxp sites flanking exon 5 of Kdm6a. To create the LKO mice, the Kdm6aflox/flox mice were crossed with Alb-Cre mice (B6.Cg-Speer6-ps1Tg(Alb-cre)21Mgn/J) obtained from Jackson Laboratory (stock no. 003574). Both Kdm6a flox/flox and the Alb-Cre mice were bred with wild type C57BJ6 mice for at least 9 generations before breeding. The paired Kdm6aflox/floxAlb-Cre <sup>-/-</sup> mice were used as negative controls.                |
| Wild animals            | Provide details on animals observed in or captured in the field; report species and age where possible. Describe how animals were caught and transported and what happened to captive animals after the study (if killed, explain why and describe method; if released, say where and when) OR state that the study did not involve wild animals.                                                                                                                                                                                    |
| Reporting on sex        | The plasma lipoprotein, liver lipid and cholesterol, bile acid analysis, PCSK9 and diet-induced atherosclerosis models and aortic root staining are performed in both males and females.                                                                                                                                                                                                                                                                                                                                             |
| Field-collected samples | For laboratory work with field-collected samples, describe all relevant parameters such as housing, maintenance, temperature, photoperiod and end-of-experiment protocol OR state that the study did not involve samples collected from the field.                                                                                                                                                                                                                                                                                   |
| Ethics oversight        | All animal experiments were approved by the respective national ethical boards (Swedish Board of Agriculture, Stockholm South, 05517-2022) and conducted in accordance with the guidelines stated in the International Guiding Principles for Biomedical Research Involving Animals, developed by the Council for International Organizations of Medical Sciences (CIOMS). All mice strains were bred and maintained at the Center for Comparative Medicine at Karolinska Institutet and University Hospital (PKL, Huddinge, Sweden) |

Note that full information on the approval of the study protocol must also be provided in the manuscript.

## Clinical data

Policy information about [clinical studies](#)

All manuscripts should comply with the ICMJE [guidelines for publication of clinical research](#) and a completed [CONSORT checklist](#) must be included with all submissions.

|                             |                                                                                                                   |
|-----------------------------|-------------------------------------------------------------------------------------------------------------------|
| Clinical trial registration | Provide the trial registration number from <a href="#">ClinicalTrials.gov</a> or an equivalent agency.            |
| Study protocol              | Note where the full trial protocol can be accessed OR if not available, explain why.                              |
| Data collection             | Describe the settings and locales of data collection, noting the time periods of recruitment and data collection. |
| Outcomes                    | Describe how you pre-defined primary and secondary outcome measures and how you assessed these measures.          |

## Dual use research of concern

Policy information about [dual use research of concern](#)

### Hazards

Could the accidental, deliberate or reckless misuse of agents or technologies generated in the work, or the application of information presented in the manuscript, pose a threat to:

- | No                                  | Yes                      |                            |
|-------------------------------------|--------------------------|----------------------------|
| <input checked="" type="checkbox"/> | <input type="checkbox"/> | Public health              |
| <input checked="" type="checkbox"/> | <input type="checkbox"/> | National security          |
| <input checked="" type="checkbox"/> | <input type="checkbox"/> | Crops and/or livestock     |
| <input checked="" type="checkbox"/> | <input type="checkbox"/> | Ecosystems                 |
| <input checked="" type="checkbox"/> | <input type="checkbox"/> | Any other significant area |

### Experiments of concern

Does the work involve any of these experiments of concern:

- | No                                  | Yes                      |                                                                             |
|-------------------------------------|--------------------------|-----------------------------------------------------------------------------|
| <input checked="" type="checkbox"/> | <input type="checkbox"/> | Demonstrate how to render a vaccine ineffective                             |
| <input checked="" type="checkbox"/> | <input type="checkbox"/> | Confer resistance to therapeutically useful antibiotics or antiviral agents |
| <input checked="" type="checkbox"/> | <input type="checkbox"/> | Enhance the virulence of a pathogen or render a nonpathogen virulent        |
| <input checked="" type="checkbox"/> | <input type="checkbox"/> | Increase transmissibility of a pathogen                                     |
| <input checked="" type="checkbox"/> | <input type="checkbox"/> | Alter the host range of a pathogen                                          |
| <input checked="" type="checkbox"/> | <input type="checkbox"/> | Enable evasion of diagnostic/detection modalities                           |
| <input checked="" type="checkbox"/> | <input type="checkbox"/> | Enable the weaponization of a biological agent or toxin                     |
| <input checked="" type="checkbox"/> | <input type="checkbox"/> | Any other potentially harmful combination of experiments and agents         |

## Plants

Seed stocks

*Report on the source of all seed stocks or other plant material used. If applicable, state the seed stock centre and catalogue number. If plant specimens were collected from the field, describe the collection location, date and sampling procedures.*

Novel plant genotypes

*Describe the methods by which all novel plant genotypes were produced. This includes those generated by transgenic approaches, gene editing, chemical/radiation-based mutagenesis and hybridization. For transgenic lines, describe the transformation method, the number of independent lines analyzed and the generation upon which experiments were performed. For gene-edited lines, describe the editor used, the endogenous sequence targeted for editing, the targeting guide RNA sequence (if applicable) and how the editor was applied.*

Authentication

*Describe any authentication procedures for each seed stock used or novel genotype generated. Describe any experiments used to assess the effect of a mutation and, where applicable, how potential secondary effects (e.g. second site T-DNA insertions, mosaicism, off-target gene editing) were examined.*

## ChIP-seq

### Data deposition

- Confirm that both raw and final processed data have been deposited in a public database such as [GEO](#).
- Confirm that you have deposited or provided access to graph files (e.g. BED files) for the called peaks.

Data access links

*May remain private before publication.*

<https://www.ncbi.nlm.nih.gov/geo/query/acc.cgi?acc=GSE287736>. Secure token of ChIP-seq Data(GSE287736) for reviewers: qpkpaceolxithix

Files in database submission

siLuc1\_H3K4me1\_1.fq.gz siLuc1\_H3K4me1\_2.fq.gz siluc1\_H3K4me1.bigwig  
 siLuc1\_H3K4me2\_1.fq.gz siLuc1\_H3K4me2\_2.fq.gz siluc2\_H3K4me1.bigwig  
 siLuc1\_H3K27ac\_1.fq.gz siLuc1\_H3K27ac\_2.fq.gz siluc3\_H3K4me1.bigwig  
 siLuc1\_H3K27me3\_1.fq.gz siLuc1\_H3K27me3\_2.fq.gz siluc4\_H3K4me1.bigwig  
 siLuc2\_H3K4me1\_1.fq.gz siLuc2\_H3K4me1\_2.fq.gz sika1\_H3K4me1.bigwig  
 siLuc2\_H3K4me2\_1.fq.gz siLuc2\_H3K4me2\_2.fq.gz sika2\_H3K4me1.bigwig  
 siLuc2\_H3K27ac\_1.fq.gz siLuc2\_H3K27ac\_2.fq.gz sika3\_H3K4me1.bigwig  
 siLuc2\_H3K27me3\_1.fq.gz siLuc2\_H3K27me3\_2.fq.gz sika4\_H3K4me1.bigwig

siLuc3\_H3K4me1\_1.fq.gz siLuc3\_H3K4me1\_2.fq.gz siha1\_H3K4me1.bigwig  
 siLuc3\_H3K4me2\_1.fq.gz siLuc3\_H3K4me2\_2.fq.gz siha2\_H3K4me1.bigwig  
 siLuc3\_H3K27ac\_1.fq.gz siLuc3\_H3K27ac\_2.fq.gz siha3\_H3K4me1.bigwig  
 siLuc3\_H3K27me3\_1.fq.gz siLuc3\_H3K27me3\_2.fq.gz siha4\_H3K4me1.bigwig  
 siLuc4\_H3K4me1\_1.fq.gz siLuc4\_H3K4me1\_2.fq.gz siLuc1\_H3K4me2.bigwig  
 siLuc4\_H3K4me2\_1.fq.gz siLuc4\_H3K4me2\_2.fq.gz siLuc2\_H3K4me2.bigwig  
 siLuc4\_H3K27ac\_1.fq.gz siLuc4\_H3K27ac\_2.fq.gz siLuc3\_H3K4me2.bigwig  
 siLuc4\_H3K27me3\_1.fq.gz siLuc4\_H3K27me3\_2.fq.gz siLuc4\_H3K4me2.bigwig  
 sika1\_H3K4me1\_1.fq.gz sika1\_H3K4me1\_2.fq.gz sika1\_H3K4me2.bigwig  
 sika1\_H3K4me2\_1.fq.gz sika1\_H3K4me2\_2.fq.gz sika2\_H3K4me2.bigwig  
 sika1\_H3K27ac\_1.fq.gz sika1\_H3K27ac\_2.fq.gz sika3\_H3K4me2.bigwig  
 sika1\_H3K27me3\_1.fq.gz sika1\_H3K27me3\_2.fq.gz sika4\_H3K4me2.bigwig  
 sika2\_H3K4me1\_1.fq.gz sika2\_H3K4me1\_2.fq.gz siha1\_H3K4me2.bigwig  
 sika2\_H3K4me2\_1.fq.gz sika2\_H3K4me2\_2.fq.gz siha2\_H3K4me2.bigwig  
 sika2\_H3K27ac\_1.fq.gz sika2\_H3K27ac\_2.fq.gz siha3\_H3K4me2.bigwig  
 sika2\_H3K27me3\_1.fq.gz sika2\_H3K27me3\_2.fq.gz siha4\_H3K4me2.bigwig  
 sika3\_H3K4me1\_1.fq.gz sika3\_H3K4me1\_2.fq.gz siLuc1\_H3K27ac.bigwig  
 sika3\_H3K4me2\_1.fq.gz sika3\_H3K4me2\_2.fq.gz siLuc2\_H3K27ac.bigwig  
 sika3\_H3K27ac\_1.fq.gz sika3\_H3K27ac\_2.fq.gz siLuc3\_H3K27ac.bigwig  
 sika3\_H3K27me3\_1.fq.gz sika3\_H3K27me3\_2.fq.gz siLuc4\_H3K27ac.bigwig  
 sika4\_H3K4me1\_1.fq.gz sika4\_H3K4me1\_2.fq.gz sika1\_H3K27ac.bigwig  
 sika4\_H3K4me2\_1.fq.gz sika4\_H3K4me2\_2.fq.gz sika2\_H3K27ac.bigwig  
 sika4\_H3K27ac\_1.fq.gz sika4\_H3K27ac\_2.fq.gz sika3\_H3K27ac.bigwig  
 sika4\_H3K27me3\_1.fq.gz sika4\_H3K27me3\_2.fq.gz sika4\_H3K27ac.bigwig  
 siha1\_H3K4me1\_1.fq.gz siha1\_H3K4me1\_2.fq.gz siha1\_H3K27ac.bigwig  
 siha1\_H3K4me2\_1.fq.gz siha1\_H3K4me2\_2.fq.gz siha2\_H3K27ac.bigwig  
 siha1\_H3K27ac\_1.fq.gz siha1\_H3K27ac\_2.fq.gz siha3\_H3K27ac.bigwig  
 siha1\_H3K27me3\_1.fq.gz siha1\_H3K27me3\_2.fq.gz siha4\_H3K27ac.bigwig  
 siha2\_H3K4me1\_1.fq.gz siha2\_H3K4me1\_2.fq.gz siLuc1\_H3K27me3.bigwig  
 siha2\_H3K4me2\_1.fq.gz siha2\_H3K4me2\_2.fq.gz siLuc2\_H3K27me3.bigwig  
 siha2\_H3K27ac\_1.fq.gz siha2\_H3K27ac\_2.fq.gz siLuc3\_H3K27me3.bigwig  
 siha2\_H3K27me3\_1.fq.gz siha2\_H3K27me3\_2.fq.gz siLuc4\_H3K27me3.bigwig  
 siha3\_H3K4me1\_1.fq.gz siha3\_H3K4me1\_2.fq.gz sika1\_H3K27me3.bigwig  
 siha3\_H3K4me2\_1.fq.gz siha3\_H3K4me2\_2.fq.gz sika2\_H3K27me3.bigwig  
 siha3\_H3K27ac\_1.fq.gz siha3\_H3K27ac\_2.fq.gz sika3\_H3K27me3.bigwig  
 siha3\_H3K27me3\_1.fq.gz siha3\_H3K27me3\_2.fq.gz sika4\_H3K27me3.bigwig  
 siha4\_H3K4me1\_1.fq.gz siha4\_H3K4me1\_2.fq.gz siha1\_H3K27me3.bigwig  
 siha4\_H3K4me2\_1.fq.gz siha4\_H3K4me2\_2.fq.gz siha2\_H3K27me3.bigwig  
 siha4\_H3K27ac\_1.fq.gz siha4\_H3K27ac\_2.fq.gz siha3\_H3K27me3.bigwig  
 siha4\_H3K27me3\_1.fq.gz siha4\_H3K27me3\_2.fq.gz siha4\_H3K27me3.bigwig  
 input\_1.fq.gz input\_2.fq.gz antiCREBH\_siluc.bigwig  
 siluc\_antiCREBH\_1.fq.gz siluc\_antiCREBH\_2.fq.gz antiCREBH\_sikDM6A.bigwig  
 sikdm6a\_antiCREBH\_1.fq.gz sikdm6a\_antiCREBH\_2.fq.gz flox1\_me1.bigwig  
 flox1\_me1\_1.fq.gz flox1\_me1\_2.fq.gz flox2\_me1.bigwig  
 flox1\_me2\_1.fq.gz flox1\_me2\_2.fq.gz flox3\_me1.bigwig  
 flox1\_ac\_1.fq.gz flox1\_ac\_2.fq.gz flox1\_me2.bigwig  
 flox1\_me3\_1.fq.gz flox1\_me3\_2.fq.gz flox2\_me2.bigwig  
 flox2\_me1\_1.fq.gz flox2\_me1\_2.fq.gz flox3\_me2.bigwig  
 flox2\_me2\_1.fq.gz flox2\_me2\_2.fq.gz flox1\_ac.bigwig  
 flox2\_ac\_1.fq.gz flox2\_ac\_2.fq.gz flox2\_ac.bigwig  
 flox2\_me3\_1.fq.gz flox2\_me3\_2.fq.gz flox3\_ac.bigwig  
 flox3\_me1\_1.fq.gz flox3\_me1\_2.fq.gz flox1\_me3.bigwig  
 flox3\_me2\_1.fq.gz flox3\_me2\_2.fq.gz flox2\_me3.bigwig  
 flox3\_ac\_1.fq.gz flox3\_ac\_2.fq.gz flox3\_me3.bigwig  
 flox3\_me3\_1.fq.gz flox3\_me3\_2.fq.gz LKO1\_me1.bigwig  
 LKO1\_me1\_1.fq.gz LKO1\_me1\_2.fq.gz LKO2\_me1.bigwig  
 LKO1\_me2\_1.fq.gz LKO1\_me2\_2.fq.gz LKO3\_me1.bigwig  
 LKO1\_ac\_1.fq.gz LKO1\_ac\_2.fq.gz LKO1\_me2.bigwig  
 LKO1\_me3\_1.fq.gz LKO1\_me3\_2.fq.gz LKO2\_me2.bigwig  
 LKO2\_me1\_1.fq.gz LKO2\_me1\_2.fq.gz LKO3\_me2.bigwig  
 LKO2\_me2\_1.fq.gz LKO2\_me2\_2.fq.gz LKO1\_ac.bigwig  
 LKO2\_ac\_1.fq.gz LKO2\_ac\_2.fq.gz LKO2\_ac.bigwig  
 LKO2\_me3\_1.fq.gz LKO2\_me3\_2.fq.gz LKO3\_ac.bigwig  
 LKO3\_me1\_1.fq.gz LKO3\_me1\_2.fq.gz LKO1\_me3.bigwig  
 LKO3\_me2\_1.fq.gz LKO3\_me2\_2.fq.gz LKO2\_me3.bigwig  
 LKO3\_ac\_1.fq.gz LKO3\_ac\_2.fq.gz LKO3\_me3.bigwig  
 LKO3\_me3\_1.fq.gz LKO3\_me3\_2.fq.gz hro\_input.bigwig  
 input\_mice\_1.fq.gz input\_mice\_2.fq.gz mice\_input.bigwig  
 NC1\_K4me1\_1.fq.gz NC1\_K4me1\_2.fq.gz NC1\_K4me1.bigwig  
 NC2\_K4me1\_1.fq.gz NC2\_K4me1\_2.fq.gz NC2\_K4me1.bigwig  
 NC3\_K4me1\_1.fq.gz NC3\_K4me1\_2.fq.gz NC3\_K4me1.bigwig  
 NC4\_K4me1\_1.fq.gz NC4\_K4me1\_2.fq.gz NC4\_K4me1.bigwig  
 KA1\_K4me1\_1.fq.gz KA1\_K4me1\_2.fq.gz KA1\_K4me1.bigwig  
 KA2\_K4me1\_1.fq.gz KA2\_K4me1\_2.fq.gz KA2\_K4me1.bigwig  
 KA3\_K4me1\_1.fq.gz KA3\_K4me1\_2.fq.gz KA3\_K4me1.bigwig  
 KA4\_K4me1\_1.fq.gz KA4\_K4me1\_2.fq.gz KA4\_K4me1.bigwig

HA1\_K4me1\_1.fq.gz HA1\_K4me1\_2.fq.gz HA1\_K4me1.bigwig  
 HA2\_K4me1\_1.fq.gz HA2\_K4me1\_2.fq.gz HA2\_K4me1.bigwig  
 HA3\_K4me1\_1.fq.gz HA3\_K4me1\_2.fq.gz HA3\_K4me1.bigwig  
 HA4\_K4me1\_1.fq.gz HA4\_K4me1\_2.fq.gz HA4\_K4me1.bigwig  
 NC1\_K4me2\_1.fq.gz NC1\_K4me2\_2.fq.gz NC1\_K4me2.bigwig  
 NC2\_K4me2\_1.fq.gz NC2\_K4me2\_2.fq.gz NC2\_K4me2.bigwig  
 NC3\_K4me2\_1.fq.gz NC3\_K4me2\_2.fq.gz NC3\_K4me2.bigwig  
 NC4\_K4me2\_1.fq.gz NC4\_K4me2\_2.fq.gz NC4\_K4me2.bigwig  
 KA1\_K4me2\_1.fq.gz KA1\_K4me2\_2.fq.gz KA1\_K4me2.bigwig  
 KA2\_K4me2\_1.fq.gz KA2\_K4me2\_2.fq.gz KA2\_K4me2.bigwig  
 KA3\_K4me2\_1.fq.gz KA3\_K4me2\_2.fq.gz KA3\_K4me2.bigwig  
 KA4\_K4me2\_1.fq.gz KA4\_K4me2\_2.fq.gz KA4\_K4me2.bigwig  
 HA1\_K4me2\_1.fq.gz HA1\_K4me2\_2.fq.gz HA1\_K4me2.bigwig  
 HA2\_K4me2\_1.fq.gz HA2\_K4me2\_2.fq.gz HA2\_K4me2.bigwig  
 HA3\_K4me2\_1.fq.gz HA3\_K4me2\_2.fq.gz HA3\_K4me2.bigwig  
 HA4\_K4me2\_1.fq.gz HA4\_K4me2\_2.fq.gz HA4\_K4me2.bigwig  
 NC1\_K27ac\_1.fq.gz NC1\_K27ac\_2.fq.gz NC1\_K27ac.bigwig  
 NC2\_K27ac\_1.fq.gz NC2\_K27ac\_2.fq.gz NC2\_K27ac.bigwig  
 NC3\_K27ac\_1.fq.gz NC3\_K27ac\_2.fq.gz NC3\_K27ac.bigwig  
 NC4\_K27ac\_1.fq.gz NC4\_K27ac\_2.fq.gz NC4\_K27ac.bigwig  
 KA1\_K27ac\_1.fq.gz KA1\_K27ac\_2.fq.gz KA1\_K27ac.bigwig  
 KA2\_K27ac\_1.fq.gz KA2\_K27ac\_2.fq.gz KA2\_K27ac.bigwig  
 KA3\_K27ac\_1.fq.gz KA3\_K27ac\_2.fq.gz KA3\_K27ac.bigwig  
 KA4\_K27ac\_1.fq.gz KA4\_K27ac\_2.fq.gz KA4\_K27ac.bigwig  
 HA1\_K27ac\_1.fq.gz HA1\_K27ac\_2.fq.gz HA1\_K27ac.bigwig  
 HA2\_K27ac\_1.fq.gz HA2\_K27ac\_2.fq.gz HA2\_K27ac.bigwig  
 HA3\_K27ac\_1.fq.gz HA3\_K27ac\_2.fq.gz HA3\_K27ac.bigwig  
 HA4\_K27ac\_1.fq.gz HA4\_K27ac\_2.fq.gz HA4\_K27ac.bigwig  
 NC1\_K27me3\_1.fq.gz NC1\_K27me3\_2.fq.gz NC1\_K27me3.bigwig  
 NC2\_K27me3\_1.fq.gz NC2\_K27me3\_2.fq.gz NC2\_K27me3.bigwig  
 NC3\_K27me3\_1.fq.gz NC3\_K27me3\_2.fq.gz NC3\_K27me3.bigwig  
 NC4\_K27me3\_1.fq.gz NC4\_K27me3\_2.fq.gz NC4\_K27me3.bigwig  
 KA1\_K27me3\_1.fq.gz KA1\_K27me3\_2.fq.gz KA1\_K27me3.bigwig  
 KA2\_K27me3\_1.fq.gz KA2\_K27me3\_2.fq.gz KA2\_K27me3.bigwig  
 KA3\_K27me3\_1.fq.gz KA3\_K27me3\_2.fq.gz KA3\_K27me3.bigwig  
 KA4\_K27me3\_1.fq.gz KA4\_K27me3\_2.fq.gz KA4\_K27me3.bigwig  
 HA1\_K27me3\_1.fq.gz HA1\_K27me3\_2.fq.gz HA1\_K27me3.bigwig  
 HA2\_K27me3\_1.fq.gz HA2\_K27me3\_2.fq.gz HA2\_K27me3.bigwig  
 HA3\_K27me3\_1.fq.gz HA3\_K27me3\_2.fq.gz HA3\_K27me3.bigwig  
 HA4\_K27me3\_1.fq.gz HA4\_K27me3\_2.fq.gz HA4\_K27me3.bigwig  
 antiCREBH\_WT\_1.fq.gz antiCREBH\_WT\_2.fq.gz antiCREBH\_WT.bigwig  
 antiCREBH\_LKO\_1.fq.gz antiCREBH\_LKO\_2.fq.gz antiCREBH\_LKO.bigwig  
 Huh1\_input\_1.fq.gz Huh1\_input\_2.fq.gz Huh1\_input.bigwig  
 input\_PCSK9\_mice\_1.fq.gz input\_PCSK9\_mice\_2.fq.gz PCSK9\_mice\_input.bigwig

Genome browser session  
(e.g. [UCSC](#))

<https://www.ncbi.nlm.nih.gov/geo/query/acc.cgi?acc=GSE287736>. Secure token of ChIP-seq Data(GSE287736) for reviewers: qpkpaceolxithix

## Methodology

### Replicates

ChIP-seq sample replicate(s) type

HROhep03\_siLuc\_H3K4me1\_rep1 4 biological  
 HROhep03\_siKDM6A\_H3K4me1\_rep1 4 biological  
 HROhep03\_siHNF4A\_H3K4me1\_rep1 4 biological  
 HROhep03\_siLuc\_H3K4me2\_rep1 4 biological  
 HROhep03\_siKDM6A\_H3K4me2\_rep1 4 biological  
 HROhep03\_siHNF4A\_H3K4me2\_rep1 4 biological  
 HROhep03\_siLuc\_H3K27ac\_rep1 4 biological  
 HROhep03\_siKDM6A\_H3K27ac\_rep1 4 biological  
 HROhep03\_siHNF4A\_H3K27ac\_rep1 4 biological  
 HROhep03\_siLuc\_H3K27me3\_rep1 4 biological  
 HROhep03\_siKDM6A\_H3K27me3\_rep1 4 biological  
 HROhep03\_siHNF4A\_H3K27me3\_rep1 4 biological  
 HROhep03\_antiCREBH\_siLuc 1 biological  
 HROhep03\_antiCREBH\_siKDM6A 1 biological  
 mice\_flox\_H3K4me1\_rep1 3 biological  
 mice\_flox\_H3K4me2\_rep1 3 biological  
 mice\_flox\_H3K27ac\_rep1 3 biological  
 mice\_flox\_H3K27me3\_rep1 3 biological  
 mice\_LKO\_H3K4me1\_rep1 3 biological  
 mice\_LKO\_H3K4me2\_rep1 3 biological  
 mice\_LKO\_H3K27ac\_rep1 3 biological  
 mice\_LKO\_H3K27me3\_rep1 3 biological  
 HROhep03\_input 1 biological  
 Mice\_input 1 biological

Huh1\_siLuc\_H3K4me1\_rep1 4 biological  
 Huh1\_siKDM6A\_H3K4me1\_rep1 4 biological  
 Huh1\_siHNF4A\_H3K4me1\_rep1 4 biological  
 Huh1\_siLuc\_H3K4me2\_rep1 4 biological  
 Huh1\_siKDM6A\_H3K4me2\_rep1 4 biological  
 Huh1\_siHNF4A\_H3K4me2\_rep1 4 biological  
 Huh1\_siLuc\_H3K27ac\_rep1 4 biological  
 Huh1\_siKDM6A\_H3K27ac\_rep1 4 biological  
 Huh1\_siHNF4A\_H3K27ac\_rep1 4 biological  
 Huh1\_siLuc\_H3K27me3\_rep1 4 biological  
 Huh1\_siKDM6A\_H3K27me3\_rep1 4 biological  
 Huh1\_siHNF4A\_H3K27me3\_rep1 4 biological  
 PCSK9\_mice\_antiCREBH\_WT 1 biological  
 PCSK9\_mice\_antiCREBH\_LKO 1 biological  
 Huh1\_input 1 biological  
 PCSK9\_mice\_input 1 biological

## Sequencing depth

All CHIP-seq samples are sequenced in paired-end.  
 CHIP-seq samples total reads unique reads length of the reads  
 HROhep03\_siLuc\_H3K4me1\_rep1 39625952 27525826 150  
 HROhep03\_siLuc\_H3K4me1\_rep2 36427559 25921671 150  
 HROhep03\_siLuc\_H3K4me1\_rep3 32301736 22114948 150  
 HROhep03\_siLuc\_H3K4me1\_rep4 28075953 19130727 150  
 HROhep03\_siKDM6A\_H3K4me1\_rep1 38304538 27124766 150  
 HROhep03\_siKDM6A\_H3K4me1\_rep2 34453562 24933104 150  
 HROhep03\_siKDM6A\_H3K4me1\_rep3 30077445 20974858 150  
 HROhep03\_siKDM6A\_H3K4me1\_rep4 26174347 18203324 150  
 HROhep03\_siHNF4A\_H3K4me1\_rep1 77933617 55016306 150  
 HROhep03\_siHNF4A\_H3K4me1\_rep2 71996002 51868322 150  
 HROhep03\_siHNF4A\_H3K4me1\_rep3 64761619 45013613 150  
 HROhep03\_siHNF4A\_H3K4me1\_rep4 52815986 36593799 150  
 HROhep03\_siLuc\_H3K4me2\_rep1 80873920 53501162 150  
 HROhep03\_siLuc\_H3K4me2\_rep2 74196132 50783963 150  
 HROhep03\_siLuc\_H3K4me2\_rep3 68042698 44587317 150  
 HROhep03\_siLuc\_H3K4me2\_rep4 56929525 37141880 150  
 HROhep03\_siKDM6A\_H3K4me2\_rep1 63402875 42952220 150  
 HROhep03\_siKDM6A\_H3K4me2\_rep2 58420583 40804511 150  
 HROhep03\_siKDM6A\_H3K4me2\_rep3 51687639 34854228 150  
 HROhep03\_siKDM6A\_H3K4me2\_rep4 41835504 28126115 150  
 HROhep03\_siHNF4A\_H3K4me2\_rep1 75097746 50175880 150  
 HROhep03\_siHNF4A\_H3K4me2\_rep2 66502240 45987031 150  
 HROhep03\_siHNF4A\_H3K4me2\_rep3 57259598 38058426 150  
 HROhep03\_siHNF4A\_H3K4me2\_rep4 51547767 34026241 150  
 HROhep03\_siLuc\_H3K27ac\_rep1 65645873 44694332 150  
 HROhep03\_siLuc\_H3K27ac\_rep2 64644498 45100757 150  
 HROhep03\_siLuc\_H3K27ac\_rep3 60129498 40222708 150  
 HROhep03\_siLuc\_H3K27ac\_rep4 52034474 34647601 150  
 HROhep03\_siKDM6A\_H3K27ac\_rep1 71334966 49696413 150  
 HROhep03\_siKDM6A\_H3K27ac\_rep2 63209983 45128802 150  
 HROhep03\_siKDM6A\_H3K27ac\_rep3 54494321 37530364 150  
 HROhep03\_siKDM6A\_H3K27ac\_rep4 45817797 31407114 150  
 HROhep03\_siHNF4A\_H3K27ac\_rep1 43143961 29719005 150  
 HROhep03\_siHNF4A\_H3K27ac\_rep2 38311321 27078565 150  
 HROhep03\_siHNF4A\_H3K27ac\_rep3 34966760 23729121 150  
 HROhep03\_siHNF4A\_H3K27ac\_rep4 29170888 19715668 150  
 HROhep03\_siLuc\_H3K27me3\_rep1 67165572 41548340 150  
 HROhep03\_siLuc\_H3K27me3\_rep2 59545507 38175106 150  
 HROhep03\_siLuc\_H3K27me3\_rep3 52207844 31997358 150  
 HROhep03\_siLuc\_H3K27me3\_rep4 45638776 27823325 150  
 HROhep03\_siKDM6A\_H3K27me3\_rep1 53017398 34065666 150  
 HROhep03\_siKDM6A\_H3K27me3\_rep2 48462252 32100277 150  
 HROhep03\_siKDM6A\_H3K27me3\_rep3 42341107 26916945 150  
 HROhep03\_siKDM6A\_H3K27me3\_rep4 37010956 23428614 150  
 HROhep03\_siHNF4A\_H3K27me3\_rep1 62059450 39329755 150  
 HROhep03\_siHNF4A\_H3K27me3\_rep2 56120527 36672986 150  
 HROhep03\_siHNF4A\_H3K27me3\_rep3 49836677 31200641 150  
 HROhep03\_siHNF4A\_H3K27me3\_rep4 42609248 26560133 150  
 HROhep03\_antiCREBH\_siLuc 68473992 57884870 150  
 HROhep03\_antiCREBH\_siKDM6A 62585938 52802940 150  
 mice\_flox\_H3K4me1\_rep1 63575611 34363037 150  
 mice\_flox\_H3K4me1\_rep2 59491770 32775147 150  
 mice\_flox\_H3K4me1\_rep3 57872851 31502694 150  
 mice\_flox\_H3K4me2\_rep1 66726387 37742678 150  
 mice\_flox\_H3K4me2\_rep2 59633715 34202885 150  
 mice\_flox\_H3K4me2\_rep3 55822997 31645752 150  
 mice\_flox\_H3K27ac\_rep1 43494088 20343830 150



mice\_flox\_H3K27ac\_rep2 39427605 19407225 150  
 mice\_flox\_H3K27ac\_rep3 49793289 27426294 150  
 mice\_flox\_H3K27me3\_rep1 33923189 14415289 150  
 mice\_flox\_H3K27me3\_rep2 33001399 13680955 150  
 mice\_flox\_H3K27me3\_rep3 49060224 23707280 150  
 mice\_LKO\_H3K4me1\_rep1 58632169 31862062 150  
 mice\_LKO\_H3K4me1\_rep2 71787122 37925219 150  
 mice\_LKO\_H3K4me1\_rep3 41240188 22119934 150  
 mice\_LKO\_H3K4me2\_rep1 56083143 30799210 150  
 mice\_LKO\_H3K4me2\_rep2 55017717 30245568 150  
 mice\_LKO\_H3K4me2\_rep3 57602357 31559818 150  
 mice\_LKO\_H3K27ac\_rep1 31346005 16104880 150  
 mice\_LKO\_H3K27ac\_rep2 83755678 45788350 150  
 mice\_LKO\_H3K27ac\_rep3 60703463 31502324 150  
 mice\_LKO\_H3K27me3\_rep1 41220446 18886676 150  
 mice\_LKO\_H3K27me3\_rep2 75747916 39006971 150  
 mice\_LKO\_H3K27me3\_rep3 34162873 15982042 150  
 HROhep03\_input 55018582 26994059 150  
 Mice\_input 37217113 10831223 150  
 Huh1\_siLuc\_H3K4me1\_rep1 66285405 35879642 150  
 Huh1\_siLuc\_H3K4me1\_rep2 66223617 36380097 150  
 Huh1\_siLuc\_H3K4me1\_rep3 64587903 35024430 150  
 Huh1\_siLuc\_H3K4me1\_rep4 52350783 28539074 150  
 Huh1\_siKDM6A\_H3K4me1\_rep1 61356755 34769417 150  
 Huh1\_siKDM6A\_H3K4me1\_rep2 58638017 32953051 150  
 Huh1\_siKDM6A\_H3K4me1\_rep3 55827771 30910846 150  
 Huh1\_siKDM6A\_H3K4me1\_rep4 55896655 31136233 150  
 Huh1\_siHNF4A\_H3K4me1\_rep1 44743073 27376382 150  
 Huh1\_siHNF4A\_H3K4me1\_rep2 49256194 29809908 150  
 Huh1\_siHNF4A\_H3K4me1\_rep3 48885075 29024606 150  
 Huh1\_siHNF4A\_H3K4me1\_rep4 49287042 29320745 150  
 Huh1\_siLuc\_H3K4me2\_rep1 45793729 25027421 150  
 Huh1\_siLuc\_H3K4me2\_rep2 53985927 29584611 150  
 Huh1\_siLuc\_H3K4me2\_rep3 52180774 27825427 150  
 Huh1\_siLuc\_H3K4me2\_rep4 52590197 27998015 150  
 Huh1\_siKDM6A\_H3K4me2\_rep1 55450309 32240098 150  
 Huh1\_siKDM6A\_H3K4me2\_rep2 59207538 34298936 150  
 Huh1\_siKDM6A\_H3K4me2\_rep3 56607566 32226045 150  
 Huh1\_siKDM6A\_H3K4me2\_rep4 56193222 32316504 150  
 Huh1\_siHNF4A\_H3K4me2\_rep1 58400244 33573544 150  
 Huh1\_siHNF4A\_H3K4me2\_rep2 59514594 33982316 150  
 Huh1\_siHNF4A\_H3K4me2\_rep3 52068749 29269456 150  
 Huh1\_siHNF4A\_H3K4me2\_rep4 54810534 31052909 150  
 Huh1\_siLuc\_H3K27ac\_rep1 56925683 33801014 150  
 Huh1\_siLuc\_H3K27ac\_rep2 60250209 35378056 150  
 Huh1\_siLuc\_H3K27ac\_rep3 59670800 34501885 150  
 Huh1\_siLuc\_H3K27ac\_rep4 53837197 31390893 150  
 Huh1\_siKDM6A\_H3K27ac\_rep1 61031034 36421652 150  
 Huh1\_siKDM6A\_H3K27ac\_rep2 66968573 39743460 150  
 Huh1\_siKDM6A\_H3K27ac\_rep3 61690246 36130350 150  
 Huh1\_siKDM6A\_H3K27ac\_rep4 54856355 32354296 150  
 Huh1\_siHNF4A\_H3K27ac\_rep1 60933725 37814616 150  
 Huh1\_siHNF4A\_H3K27ac\_rep2 58165608 35819335 150  
 Huh1\_siHNF4A\_H3K27ac\_rep3 61670711 37473411 150  
 Huh1\_siHNF4A\_H3K27ac\_rep4 53589800 32795371 150  
 Huh1\_siLuc\_H3K27me3\_rep1 45149015 17880796 150  
 Huh1\_siLuc\_H3K27me3\_rep2 45758673 17861090 150  
 Huh1\_siLuc\_H3K27me3\_rep3 45572839 17496195 150  
 Huh1\_siLuc\_H3K27me3\_rep4 51838478 19893387 150  
 Huh1\_siKDM6A\_H3K27me3\_rep1 40474704 16620186 150  
 Huh1\_siKDM6A\_H3K27me3\_rep2 50893271 20552310 150  
 Huh1\_siKDM6A\_H3K27me3\_rep3 44421627 17677165 150  
 Huh1\_siKDM6A\_H3K27me3\_rep4 48647866 19359317 150  
 Huh1\_siHNF4A\_H3K27me3\_rep1 41600310 17053218 150  
 Huh1\_siHNF4A\_H3K27me3\_rep2 50696768 20421523 150  
 Huh1\_siHNF4A\_H3K27me3\_rep3 42303895 16787291 150  
 Huh1\_siHNF4A\_H3K27me3\_rep4 47256069 18773044 150  
 PCSK9\_mice\_antiCREBH\_WT 82734930 55591283 150  
 PCSK9\_mice\_antiCREBH\_LKO 94424961 57018122 150  
 Huh1\_input 53016012 16366413 150  
 PCSK9\_mice\_input 97187372 29755599 150

Antibodies

control rabbit IgG (sc-2027, Santa Cruz), anti-H3K27ac (ab177178, Abcam), anti-H3K4me1 (ab8895, Abcam), anti-H3K4me2 (ab7766,

## Antibodies

Abcam), anti-H3K27me3 (07-449, Millipore) and anti-CREBH (HPA040671, Sigma Aldrich)

## Peak calling parameters

Sequenced raw data (in fastq) were aligned to human hg38 or mouse mm10 genome using Bowtie2 program with all default settings. All peaks were determined by the HOMER findPeaks program against the input samples with the following options:

- i <input tag directory> (input sample)
- tbp 1 (maximum 1 tag per bp to count);
- inputtbp 1 (maximum 1 tag per bp to count in Input);
- other default settings:
- gsize (Set effective mappable genome size, default: 2e9)
- F (fold enrichment over input tag count, default: 4.0);
- L (fold enrichment over local tag count, default: 4.0);
- C (fold enrichment limit of expected unique tag positions, default: 2.0);
- fdr (False discovery rate, default = 0.001)

## Data quality

ChIP-seq samples peak number

HROhep03\_siLuc\_H3K4me1\_rep1 101396  
HROhep03\_siLuc\_H3K4me1\_rep2 109511  
HROhep03\_siLuc\_H3K4me1\_rep3 99619  
HROhep03\_siLuc\_H3K4me1\_rep4 90705  
HROhep03\_siKDM6A\_H3K4me1\_rep1 95365  
HROhep03\_siKDM6A\_H3K4me1\_rep2 101322  
HROhep03\_siKDM6A\_H3K4me1\_rep3 92376  
HROhep03\_siKDM6A\_H3K4me1\_rep4 83434  
HROhep03\_siHNF4A\_H3K4me1\_rep1 125052  
HROhep03\_siHNF4A\_H3K4me1\_rep2 119211  
HROhep03\_siHNF4A\_H3K4me1\_rep3 122319  
HROhep03\_siHNF4A\_H3K4me1\_rep4 104392  
HROhep03\_siLuc\_H3K4me2\_rep1 74885  
HROhep03\_siLuc\_H3K4me2\_rep2 72696  
HROhep03\_siLuc\_H3K4me2\_rep3 72586  
HROhep03\_siLuc\_H3K4me2\_rep4 67243  
HROhep03\_siKDM6A\_H3K4me2\_rep1 68798  
HROhep03\_siKDM6A\_H3K4me2\_rep2 67267  
HROhep03\_siKDM6A\_H3K4me2\_rep3 61909  
HROhep03\_siKDM6A\_H3K4me2\_rep4 60470  
HROhep03\_siHNF4A\_H3K4me2\_rep1 78100  
HROhep03\_siHNF4A\_H3K4me2\_rep2 78518  
HROhep03\_siHNF4A\_H3K4me2\_rep3 73051  
HROhep03\_siHNF4A\_H3K4me2\_rep4 75094  
HROhep03\_siLuc\_H3K27ac\_rep1 74318  
HROhep03\_siLuc\_H3K27ac\_rep2 73394  
HROhep03\_siLuc\_H3K27ac\_rep3 70934  
HROhep03\_siLuc\_H3K27ac\_rep4 72031  
HROhep03\_siKDM6A\_H3K27ac\_rep1 69572  
HROhep03\_siKDM6A\_H3K27ac\_rep2 71283  
HROhep03\_siKDM6A\_H3K27ac\_rep3 65196  
HROhep03\_siKDM6A\_H3K27ac\_rep4 65570  
HROhep03\_siHNF4A\_H3K27ac\_rep1 64453  
HROhep03\_siHNF4A\_H3K27ac\_rep2 61366  
HROhep03\_siHNF4A\_H3K27ac\_rep3 65914  
HROhep03\_siHNF4A\_H3K27ac\_rep4 59940  
HROhep03\_siLuc\_H3K27me3\_rep1 80575  
HROhep03\_siLuc\_H3K27me3\_rep2 70505  
HROhep03\_siLuc\_H3K27me3\_rep3 78781  
HROhep03\_siLuc\_H3K27me3\_rep4 64816  
HROhep03\_siKDM6A\_H3K27me3\_rep1 84168  
HROhep03\_siKDM6A\_H3K27me3\_rep2 77468  
HROhep03\_siKDM6A\_H3K27me3\_rep3 66867  
HROhep03\_siKDM6A\_H3K27me3\_rep4 75659  
HROhep03\_siHNF4A\_H3K27me3\_rep1 98659  
HROhep03\_siHNF4A\_H3K27me3\_rep2 90897  
HROhep03\_siHNF4A\_H3K27me3\_rep3 80190  
HROhep03\_siHNF4A\_H3K27me3\_rep4 88941  
HROhep03\_antiCREBH\_siLuc 8142  
HROhep03\_antiCREBH\_siKDM6A 2504  
mice\_flox\_H3K4me1\_rep1 14241  
mice\_flox\_H3K4me1\_rep2 16368  
mice\_flox\_H3K4me1\_rep3 14628  
mice\_flox\_H3K4me2\_rep1 32874  
mice\_flox\_H3K4me2\_rep2 33134  
mice\_flox\_H3K4me2\_rep3 33829  
mice\_flox\_H3K27ac\_rep1 39493  
mice\_flox\_H3K27ac\_rep2 32472  
mice\_flox\_H3K27ac\_rep3 41594  
mice\_flox\_H3K27me3\_rep1 2786  
mice\_flox\_H3K27me3\_rep2 2233

mice\_flox\_H3K27me3\_rep3 959  
 mice\_LKO\_H3K4me1\_rep1 4636  
 mice\_LKO\_H3K4me1\_rep2 103  
 mice\_LKO\_H3K4me1\_rep3 1540  
 mice\_LKO\_H3K4me2\_rep1 36120  
 mice\_LKO\_H3K4me2\_rep2 35733  
 mice\_LKO\_H3K4me2\_rep3 36558  
 mice\_LKO\_H3K27ac\_rep1 37358  
 mice\_LKO\_H3K27ac\_rep2 31145  
 mice\_LKO\_H3K27ac\_rep3 30425  
 mice\_LKO\_H3K27me3\_rep1 42002  
 mice\_LKO\_H3K27me3\_rep2 41145  
 mice\_LKO\_H3K27me3\_rep3 42483  
 Huh1\_siLuc\_H3K4me1\_rep1 128707  
 Huh1\_siLuc\_H3K4me1\_rep2 105393  
 Huh1\_siLuc\_H3K4me1\_rep3 127991  
 Huh1\_siLuc\_H3K4me1\_rep4 134058  
 Huh1\_siKDM6A\_H3K4me1\_rep1 110432  
 Huh1\_siKDM6A\_H3K4me1\_rep2 106789  
 Huh1\_siKDM6A\_H3K4me1\_rep3 101251  
 Huh1\_siKDM6A\_H3K4me1\_rep4 101960  
 Huh1\_siHNF4A\_H3K4me1\_rep1 131113  
 Huh1\_siHNF4A\_H3K4me1\_rep2 137823  
 Huh1\_siHNF4A\_H3K4me1\_rep3 135841  
 Huh1\_siHNF4A\_H3K4me1\_rep4 135840  
 Huh1\_siLuc\_H3K4me2\_rep1 90045  
 Huh1\_siLuc\_H3K4me2\_rep2 96581  
 Huh1\_siLuc\_H3K4me2\_rep3 94056  
 Huh1\_siLuc\_H3K4me2\_rep4 94374  
 Huh1\_siKDM6A\_H3K4me2\_rep1 78808  
 Huh1\_siKDM6A\_H3K4me2\_rep2 80824  
 Huh1\_siKDM6A\_H3K4me2\_rep3 78690  
 Huh1\_siKDM6A\_H3K4me2\_rep4 79208  
 Huh1\_siHNF4A\_H3K4me2\_rep1 83385  
 Huh1\_siHNF4A\_H3K4me2\_rep2 83865  
 Huh1\_siHNF4A\_H3K4me2\_rep3 96264  
 Huh1\_siHNF4A\_H3K4me2\_rep4 79836  
 Huh1\_siLuc\_H3K27ac\_rep1 60915  
 Huh1\_siLuc\_H3K27ac\_rep2 63234  
 Huh1\_siLuc\_H3K27ac\_rep3 62599  
 Huh1\_siLuc\_H3K27ac\_rep4 70552  
 Huh1\_siKDM6A\_H3K27ac\_rep1 60087  
 Huh1\_siKDM6A\_H3K27ac\_rep2 63234  
 Huh1\_siKDM6A\_H3K27ac\_rep3 62599  
 Huh1\_siKDM6A\_H3K27ac\_rep4 55674  
 Huh1\_siHNF4A\_H3K27ac\_rep1 58694  
 Huh1\_siHNF4A\_H3K27ac\_rep2 64403  
 Huh1\_siHNF4A\_H3K27ac\_rep3 58396  
 Huh1\_siHNF4A\_H3K27ac\_rep4 60741  
 Huh1\_siLuc\_H3K27me3\_rep1 78178  
 Huh1\_siLuc\_H3K27me3\_rep2 78622  
 Huh1\_siLuc\_H3K27me3\_rep3 77281  
 Huh1\_siLuc\_H3K27me3\_rep4 85201  
 Huh1\_siKDM6A\_H3K27me3\_rep1 74961  
 Huh1\_siKDM6A\_H3K27me3\_rep2 88050  
 Huh1\_siKDM6A\_H3K27me3\_rep3 79123  
 Huh1\_siKDM6A\_H3K27me3\_rep4 84407  
 Huh1\_siHNF4A\_H3K27me3\_rep1 67117  
 Huh1\_siHNF4A\_H3K27me3\_rep2 78269  
 Huh1\_siHNF4A\_H3K27me3\_rep3 65529  
 Huh1\_siHNF4A\_H3K27me3\_rep4 72837  
 PCSK9\_mice\_antiCREBH\_WT 1528  
 PCSK9\_mice\_antiCREBH\_LKO 517

## Software

Homer(v5.1); Bowtie2 (v2.5.4); MACS2 (v2.2.9.1)

## Flow Cytometry

### Plots

Confirm that:

- The axis labels state the marker and fluorochrome used (e.g. CD4-FITC).
- The axis scales are clearly visible. Include numbers along axes only for bottom left plot of group (a 'group' is an analysis of identical markers).
- All plots are contour plots with outliers or pseudocolor plots.
- A numerical value for number of cells or percentage (with statistics) is provided.

### Methodology

- Sample preparation *Describe the sample preparation, detailing the biological source of the cells and any tissue processing steps used.*
- Instrument *Identify the instrument used for data collection, specifying make and model number.*
- Software *Describe the software used to collect and analyze the flow cytometry data. For custom code that has been deposited into a community repository, provide accession details.*
- Cell population abundance *Describe the abundance of the relevant cell populations within post-sort fractions, providing details on the purity of the samples and how it was determined.*
- Gating strategy *Describe the gating strategy used for all relevant experiments, specifying the preliminary FSC/SSC gates of the starting cell population, indicating where boundaries between "positive" and "negative" staining cell populations are defined.*

- Tick this box to confirm that a figure exemplifying the gating strategy is provided in the Supplementary Information.

## Magnetic resonance imaging

### Experimental design

- Design type *Indicate task or resting state; event-related or block design.*
- Design specifications *Specify the number of blocks, trials or experimental units per session and/or subject, and specify the length of each trial or block (if trials are blocked) and interval between trials.*
- Behavioral performance measures *State number and/or type of variables recorded (e.g. correct button press, response time) and what statistics were used to establish that the subjects were performing the task as expected (e.g. mean, range, and/or standard deviation across subjects).*

### Acquisition

- Imaging type(s) *Specify: functional, structural, diffusion, perfusion.*
- Field strength *Specify in Tesla*
- Sequence & imaging parameters *Specify the pulse sequence type (gradient echo, spin echo, etc.), imaging type (EPI, spiral, etc.), field of view, matrix size, slice thickness, orientation and TE/TR/flip angle.*
- Area of acquisition *State whether a whole brain scan was used OR define the area of acquisition, describing how the region was determined.*
- Diffusion MRI  Used  Not used

### Preprocessing

- Preprocessing software *Provide detail on software version and revision number and on specific parameters (model/functions, brain extraction, segmentation, smoothing kernel size, etc.).*
- Normalization *If data were normalized/standardized, describe the approach(es): specify linear or non-linear and define image types used for transformation OR indicate that data were not normalized and explain rationale for lack of normalization.*
- Normalization template *Describe the template used for normalization/transformation, specifying subject space or group standardized space (e.g. original Talairach, MNI305, ICBM152) OR indicate that the data were not normalized.*
- Noise and artifact removal *Describe your procedure(s) for artifact and structured noise removal, specifying motion parameters, tissue signals and physiological signals (heart rate, respiration).*

Volume censoring

Define your software and/or method and criteria for volume censoring, and state the extent of such censoring.

## Statistical modeling & inference

Model type and settings

Specify type (mass univariate, multivariate, RSA, predictive, etc.) and describe essential details of the model at the first and second levels (e.g. fixed, random or mixed effects; drift or auto-correlation).

Effect(s) tested

Define precise effect in terms of the task or stimulus conditions instead of psychological concepts and indicate whether ANOVA or factorial designs were used.

Specify type of analysis:  Whole brain  ROI-based  Both

Statistic type for inference

Specify voxel-wise or cluster-wise and report all relevant parameters for cluster-wise methods.

(See [Eklund et al. 2016](#))

Correction

Describe the type of correction and how it is obtained for multiple comparisons (e.g. FWE, FDR, permutation or Monte Carlo).

## Models & analysis

n/a | Involved in the study

Functional and/or effective connectivity

Graph analysis

Multivariate modeling or predictive analysis

Functional and/or effective connectivity

Report the measures of dependence used and the model details (e.g. Pearson correlation, partial correlation, mutual information).

Graph analysis

Report the dependent variable and connectivity measure, specifying weighted graph or binarized graph, subject- or group-level, and the global and/or node summaries used (e.g. clustering coefficient, efficiency, etc.).

Multivariate modeling and predictive analysis

Specify independent variables, features extraction and dimension reduction, model, training and evaluation metrics.
